# Supplementary material for: Unique Li deposition behavior in Li3PS4 solid electrolyte observed via operando X-ray computed tomography
Source: Royal Society of Chemistry journal article supplement (doi:10.1039/d2cc05224e), 2023-01-01
Supplement: d2cc05224e1.pdf [file d2cc05224e1.pdf]

Supporting information

**Unique lithium precipitation behavior inside  $\text{Li}_3\text{PS}_4$  solid electrolyte observed via multimodal/multiscale *operando* X-ray computed tomography**

Jaehye Park<sup>1</sup>, Toshiki Watanabe<sup>1\*</sup>, Seunghoon Yang<sup>1</sup>, Kentaro Yamamoto<sup>1,2</sup>, Tomoki Uchiyama<sup>1</sup>, Tsuyoshi Takami<sup>1</sup>, Atsushi Sakuda<sup>3</sup>, Akitoshi Hayashi<sup>3</sup>, Masahiro Tatsumisago<sup>3</sup>, Yoshiharu Uchimoto<sup>1</sup>

<sup>1</sup> Graduate School of Human and Environmental Studies, Kyoto University, Kyoto 606-8501, Japan

<sup>2</sup> Faculty of Engineering, Nara Women's University, Kita Uoya Higashimachi, Nara 630-8506, Japan

<sup>3</sup> Department of Applied Chemistry, Graduate of School Engineering, Osaka Metropolitan University, Sakai, Osaka 599-8531, Japan

## EXPERIMENTAL METHODS

### 1. Material preparation

$\text{Li}_3\text{PS}_4$  glass was prepared using a mechanical milling method. Stoichiometric amounts of  $\text{Li}_2\text{S}$  (Sigma-Aldrich, >99.9%) and  $\text{P}_2\text{S}_5$  (Sigma-Aldrich, 99%) were mixed using an agate mortar and pestle, and the mixture was mechanically milled at 600 rpm for 20 h using a  $\text{ZrO}_2$  pot with  $\text{ZrO}_2$  balls (60 g). Powder X-ray diffraction (XRD,  $\text{CuK}\alpha$ , 45 kV, 40 mA) patterns were recorded using an RINT-Ultima III (Rigaku) to verify the amorphous structure of  $\text{Li}_3\text{PS}_4$  at room temperature. An Ar-filled sample holder was used to prevent degradation due to moisture. Raman spectra of the  $\text{Li}_3\text{PS}_4$  powders were obtained using a DXR3 Smart Raman spectrometer (Thermo Fisher Scientific) with a 532 nm diode-pumped solid-state laser. Furthermore, scanning electron microscopy (SEM) was conducted using a Hitachi SU8220 to observe  $\text{Li}_3\text{PS}_4$ .

### 2. Galvanostatic cycling tests

$\text{Li}/\text{Li}_3\text{PS}_4/\text{Li}$  cells with a diameter of 10 mm were constructed for electrochemical measurements in an argon-filled glove box.  $\text{Li}_3\text{PS}_4$  pellets were prepared by pressing  $\text{Li}_3\text{PS}_4$  powder uniaxially at 360 MPa. Li foils were attached to both sides of the  $\text{Li}_3\text{PS}_4$  pellets and Cu current collectors were placed on the Li foils. Galvanostatic cycling tests were conducted for the symmetric cells at various current densities at 25°C.

### 3. Ionic and electronic conductivity measurements

Dense  $\text{Li}_3\text{PS}_4$  pellets with a thickness of 0.8 mm and diameter of 10 mm were prepared for ionic conductivity measurements by pressing the  $\text{Li}_3\text{PS}_4$  powder using stainless steel bars from both sides at 360 MPa in an argon-filled glove box. The ionic conductivity of  $\text{Li}_3\text{PS}_4$  was measured using electrochemical impedance spectroscopy with an amplitude of 10 mV and frequency of 1 MHz to 0.1 Hz at 25°C. Equal amount of  $\text{Li}_3\text{PS}_4$  pellets were prepared for electronic conductivity measurements by pressing  $\text{Li}_3\text{PS}_4$  powder sandwiched with Cu foil from both sides using stainless steel bars at 360 MPa in an argon-filled glove box. The electronic conductivity of  $\text{Li}_3\text{PS}_4$  at 25°C was measured by applying a direct current voltage of 0.1 V to the  $\text{Cu}/\text{Li}_3\text{PS}_4/\text{Cu}$  cell.

#### 4. X-ray absorption spectroscopy (XAS)

The XAS spectra of the Li/Li<sub>3</sub>PS<sub>4</sub>/Li cells before and after short-circuiting by critical current density (CCD) testing were measured using the partial fluorescence yield method at beamline BL27SU at SPring-8 (Japan).

#### 5. *Operando* X-ray computed tomography (CT) measurements

A homemade electrochemical cell with an inner diameter of 1 mm, shown in Figure S3, was used for the *operando* CT measurements. In a glove box with an Ar atmosphere controlled below the dew point of -90°C, Li<sub>3</sub>PS<sub>4</sub> was filled into the homemade cell and sandwiched between Li metal to construct a Li/Li<sub>3</sub>PS<sub>4</sub>/Li symmetric cell. Then, the homemade cell was tightly sealed with an O-ring to avoid contact of the Li and Li<sub>3</sub>PS<sub>4</sub> with air (see FigureS8). After taking the homemade cell from the glove box, the *operando* CT measurements were conducted with an X-ray energy of 15 keV without air exposure at beamline BL20XU at SPring-8, Japan. The CT images were collected immediately every 30 min during plating at 0.8 mA cm<sup>-2</sup> with micro- and nanoscale modes, which have different spatial resolutions. The CT image with the micro-scale mode was obtained using absorption-contrast mode with a charge-coupled device camera (2048 × 2048 pixels); 1800 radiographs were collected using an exposure time of 30 ms during 180° rotation. The field of view at the micro-scale was 1 mm × 1 mm and the resolution was 1 μm. The CT image with the nano-scale mode was obtained using a microscope system with a condenser and zone plate. The images were collected using absorption-contrast and phase-contrast methods with a charge-coupled device camera; 1800 radiographs were collected using an exposure time of 500 ms with 180° rotation. The field of view at the nano-scale was 65 μm × 65 μm and the voxel size was 64 nm. After a series of data processing steps, the shadow images were converted into cross-sectional slices, which were then stacked together to render a three-dimensional (3D) reconstruction of the cell.

## Reductive decomposition of Li<sub>3</sub>PS<sub>4</sub>

When Li<sub>3</sub>PS<sub>4</sub> is reductively decomposed into Li<sub>3</sub>P and Li<sub>2</sub>S, the reaction equation considered is Equation S1 shown below. The respective densities are 1.85 for Li<sub>3</sub>PS<sub>4</sub>, 1.67 for Li<sub>2</sub>S, and 1.48 g/cm<sup>3</sup> for Li<sub>3</sub>P.<sup>1</sup> Calculating from these values, the volume of Li<sub>3</sub>PS<sub>4</sub> expands about 1.5 times after decomposition. The porosity of the electrolyte layer from the CT image to 0-1.5 h, when Li deposition begins, is shown in Figure S5. The formation of decomposition products causes the volume to expand and the porosity to decrease.

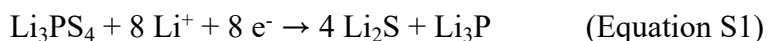

## Influence of secondary particle systems on Li<sub>3</sub>PS<sub>4</sub>

To examine the effect of the secondary particle size and compaction density of Li<sub>3</sub>PS<sub>4</sub> and CCD of the solid electrolyte layer, a liquid phase method was used to synthesize Li<sub>3</sub>PS<sub>4</sub> with a smaller secondary particle size than that obtained by mechanical milling Li<sub>3</sub>PS<sub>4</sub>.<sup>2</sup> Figure S9 shows SEM images of the solid-phase synthesized Li<sub>3</sub>PS<sub>4</sub> and the liquid phase synthesized Li<sub>3</sub>PS<sub>4</sub> as well as CT images of the electrolyte layers of these electrolytes compressed at 360 MPa. The secondary particle size of the Li<sub>3</sub>PS<sub>4</sub> by using liquid phase synthesis was approximately 1–2 μm from SEM image, which was smaller than that (10–50 μm) of the Li<sub>3</sub>PS<sub>4</sub> by using mechanical milling method (Figure S9a and b). The CT images showed that the average void ratio in the solid electrolyte layer of the solid-phase synthesized Li<sub>3</sub>PS<sub>4</sub> was 0.47%, which value was larger than that of the liquid-phase synthesized Li<sub>3</sub>PS<sub>4</sub> (0.42%). The CCD tests were performed with Li/solid electrolyte/Li cells using these two kinds of electrolytes, which have different average void ratio in the solid electrolyte layer (Figure S10). In the CCD tests charge/discharge cycles were performed while increasing the current density until a short circuit occurred, and the current density just before the short circuit occurred was defined as CCD. The CCD value of the symmetric cell using the Li<sub>3</sub>PS<sub>4</sub> with relatively high void ratio (0.47%) was 0.32 mA cm<sup>-2</sup>, and which was same as that of the symmetric cell using the Li<sub>3</sub>PS<sub>4</sub> with relatively low void ratio (0.42%). These results suggest that the density of the electrolyte layer increases with decreasing the particle size of the solid

electrolyte, but the density difference does not affect the lithium dendrite formation speed. This is probably because the Young's modulus of  $\text{Li}_3\text{PS}_4$  is small of  $23 \text{ GPa}^3$ , and thus the dense solid electrolyte

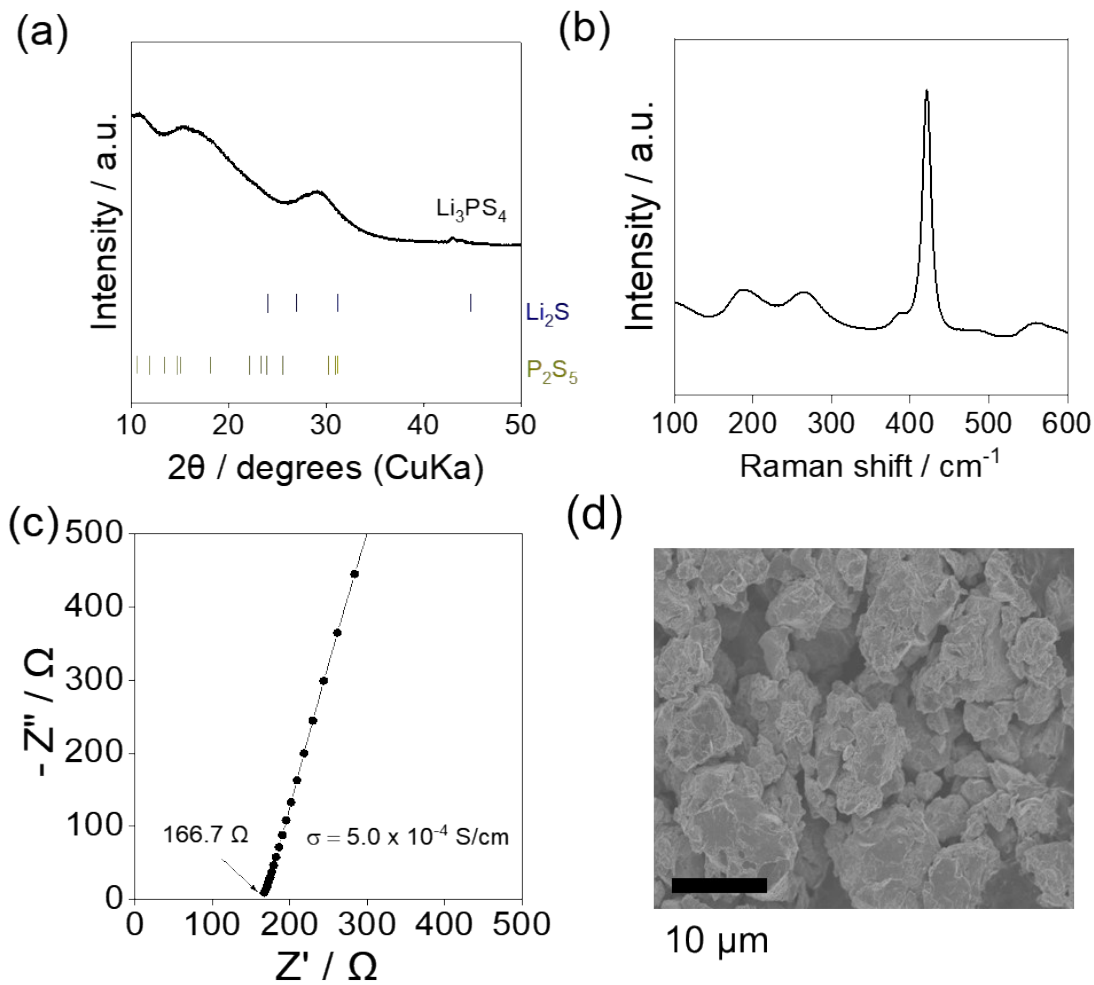

**Figure S1.** (a) The XRD pattern for amorphous  $\text{Li}_3\text{PS}_4$ . (b) Raman spectrum between  $300$  and  $500 \text{ cm}^{-1}$  of the  $\text{Li}_3\text{PS}_4$  powder sample. (c) The Nyquist plot of  $\text{Li}_3\text{PS}_4$  solid electrolyte. (d) SEM image showing morphology of  $\text{Li}_3\text{PS}_4$ .

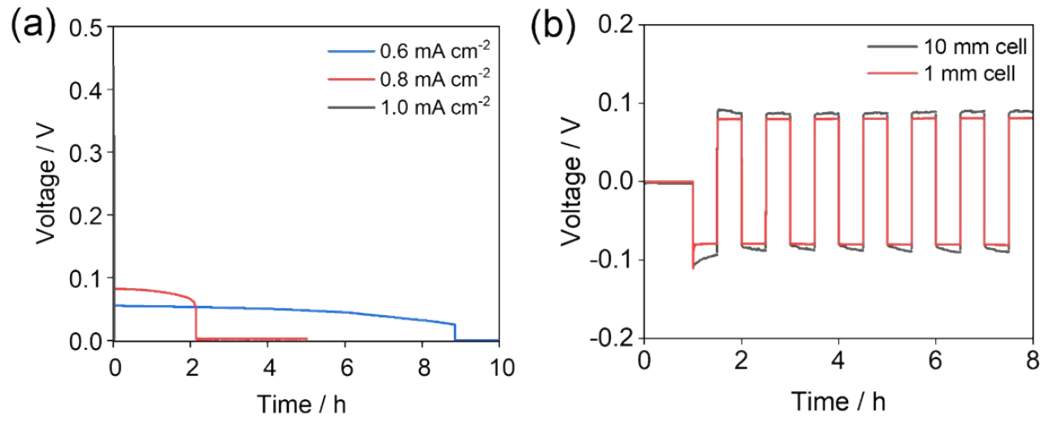

**Figure S2.** (a) Galvanostatic lithium plating of a Li/Li<sub>3</sub>PS<sub>4</sub>/Li symmetric cell (diameter of 1 mm) at 25°C at current densities of 1.0, 0.8, and 0.6 mA cm<sup>-2</sup>. (b) Results of galvanostatic lithium deposition-stripping test for Li/Li<sub>3</sub>PS<sub>4</sub>/Li symmetric cells (diameter of 10 or 1 mm) at a constant current density of 0.8 mA cm<sup>-2</sup> at 25°C, showing that the two cells were nearly identical.

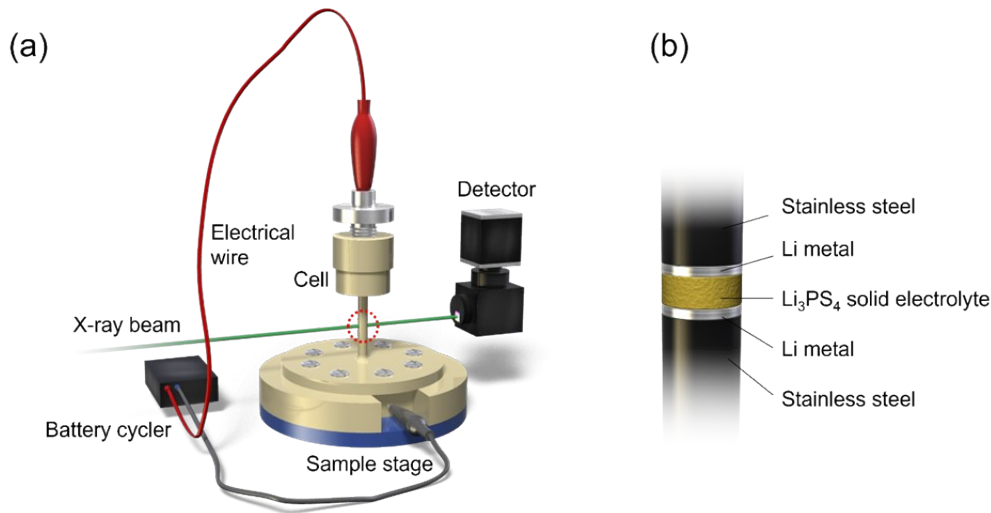

**Figure S3.** (a) Schematic depiction of the experimental beamline setup for operando X-ray CT. (b) Magnified image of the in-operando cell (diameter of 1 mm) for synchrotron X-ray CT.

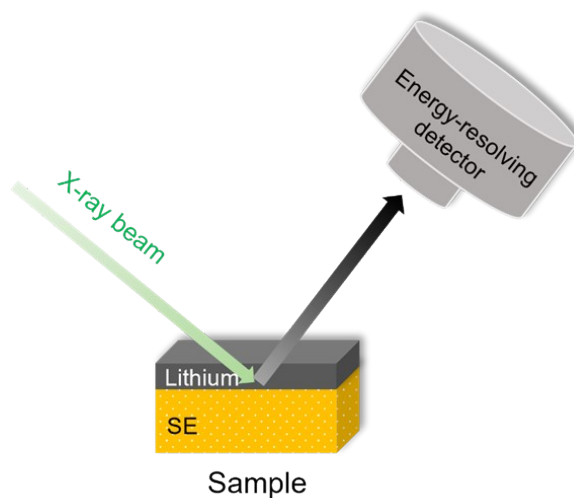

**Figure S4.** Schematic diagram of the PFY-XAS measurement setup using a synchrotron X-ray beam.

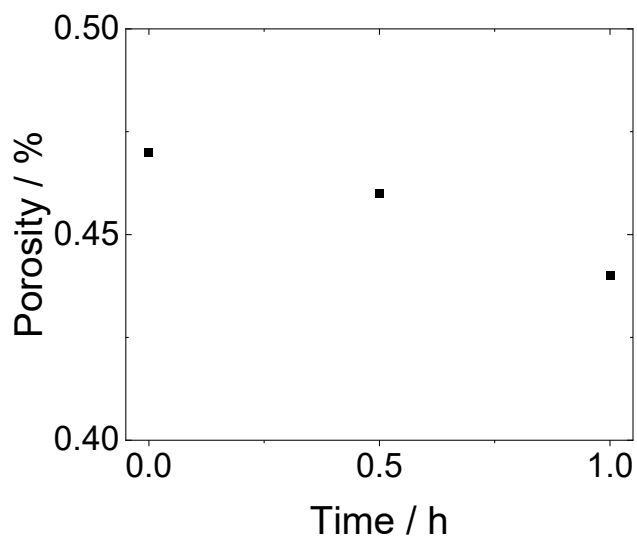

**Figure S5.** Quantitative analysis of the porosity in  $\text{Li}_3\text{PS}_4$  measured from tomography. Each point represents porosity of the solid electrolyte at different times during the experiment in Figure 2a, and shows the void percentage of the total volume of the solid electrolyte at a given time.

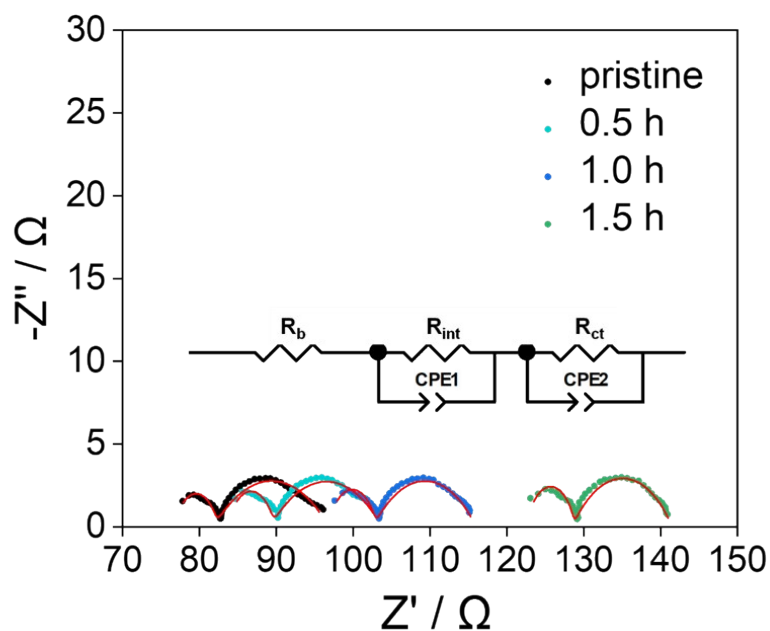

**Figure S6.** Nyquist plots and equivalent circuit fits of the pristine cell, after 0.5 h, after 1.0 h, and after 1.5 h based on data from Table S2.

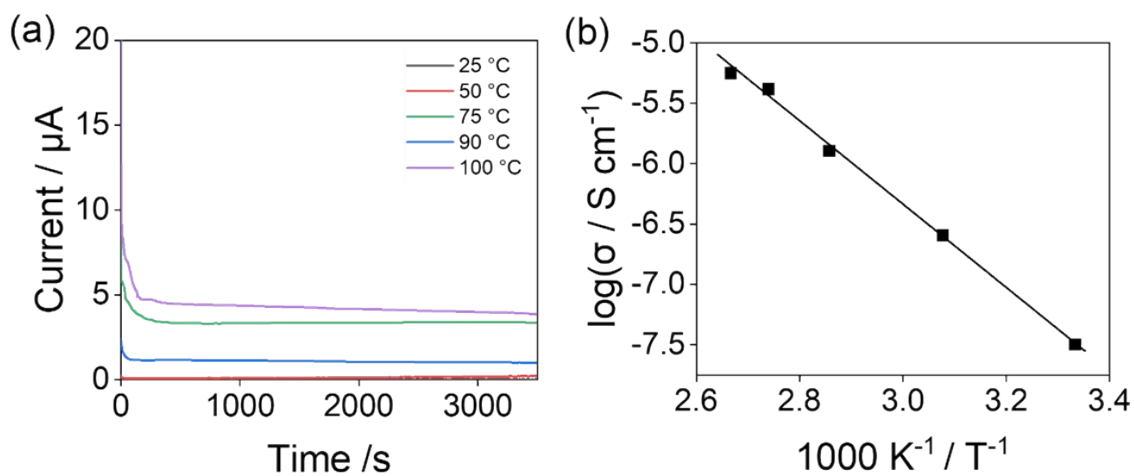

**Figure S7.** (a) Current-time curves of Cu/Li<sub>3</sub>PS<sub>4</sub>/Cu cells under direct current polarization at 100 mV. (b) Temperature dependences of electronic conductivity of Li<sub>3</sub>PS<sub>4</sub>.



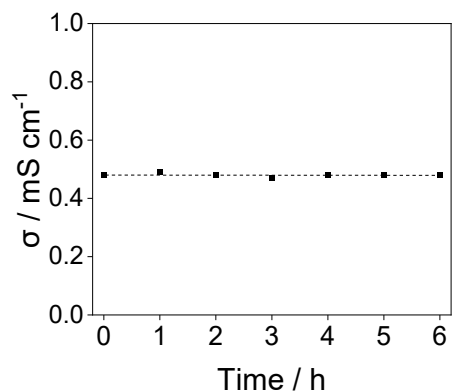

**Figure S8.** Time dependences of ionic conductivity of  $\text{Li}_3\text{PS}_4$  solid electrolyte assembled in the operando cell (diameter of 1 mm) which was constant to  $4.8 \times 10^{-4} \text{ S cm}^{-1}$ .

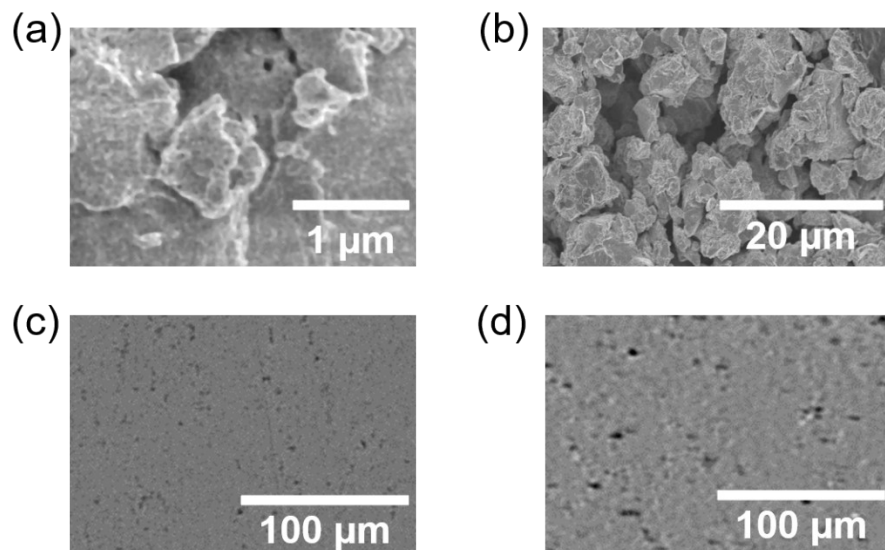

**Figure S9.** SEM images of (a) liquid-phase synthesized  $\text{Li}_3\text{PS}_4$  and (b) solid-phase synthesized  $\text{Li}_3\text{PS}_4$ . Cross-sectional image slice taken from CT measurements of  $\text{Li}_3\text{PS}_4$  pellet under 360 MPa using (c) liquid-phase synthesized  $\text{Li}_3\text{PS}_4$  and (d) solid-phase synthesized  $\text{Li}_3\text{PS}_4$ , respectively.

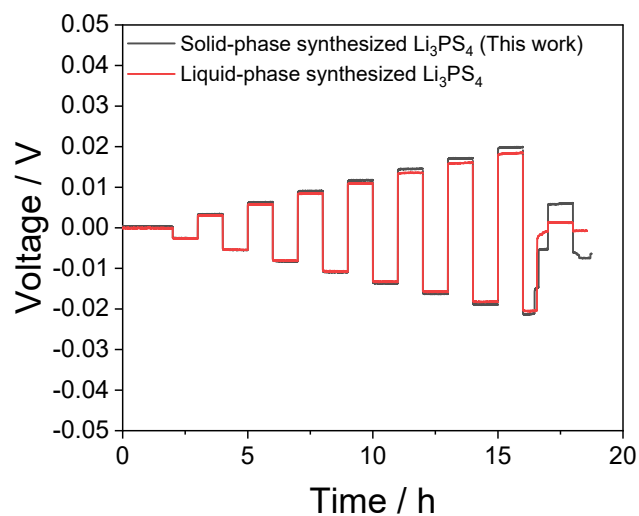

**Figure S10.** Critical current density test results for Li/solid electrolyte/Li cell using  $\text{Li}_3\text{PS}_4$  synthesized via liquid-phase method and mechanical milling with current density increasing by  $0.04 \text{ mA cm}^{-2}$  after charging and discharging for 1 h at  $25 \text{ }^\circ\text{C}$ . The inset arrow is an indicator of the ease of short-circuit caused by Li dendrite growth.

**Table S1.** Values used to compute V for Figure 1d.

| Charging time<br>(h) | Theoretical V of lithium<br>( $\times 10^6 \mu\text{m}^3$ ) | V of crack<br>( $\times 10^6 \mu\text{m}^3$ ) |
|----------------------|-------------------------------------------------------------|-----------------------------------------------|
| 0                    | 0                                                           | 0                                             |
| 0.5                  | 1.4                                                         | 0                                             |
| 1.0                  | 2.8                                                         | 0                                             |
| 1.5                  | 4.1                                                         | 0.11                                          |
| 3.2                  | 8.8                                                         | 3.2                                           |

**Table S2.** Time-based impedance parameters used for the fitting process to obtain the Nyquist

| Plating time (h) | R <sub>int</sub> (Ω) | Q (× 10 <sup>-7</sup> ) | n    | Capacitance (× 10 <sup>-8</sup> F) | R <sub>ct</sub> (Ω) | Q       | n    | Capacitance (× 10 <sup>-5</sup> F) |
|------------------|----------------------|-------------------------|------|------------------------------------|---------------------|---------|------|------------------------------------|
| 0                | 5.1                  | 6.5                     | 0.82 | 4.5                                | 15                  | 0.00090 | 0.63 | 7.2                                |
| 0.5              | 5.6                  | 6.6                     | 0.82 | 4.3                                | 14                  | 0.00088 | 0.59 | 4.2                                |
| 1                | 5.9                  | 6.4                     | 0.82 | 4.3                                | 13                  | 0.00081 | 0.58 | 3.0                                |
| 1.5              | 6.0                  | 3.6                     | 0.86 | 4.6                                | 13                  | 0.00079 | 0.52 | 1.0                                |
| 2.5              | 6.8                  | 1.7                     | 0.92 | 3.5                                | 12                  | 0.00079 | 0.52 | 1.0                                |

plots in Figure S6.

The theoretical V of lithium calculated above was used to clarify that the majority of crack is attributed to Li rather than voids, such that the equivalency can be described as follows:

$$\text{Theoretical } V (\mu\text{m}^3) = \frac{0.8 \text{ mA/cm}^2 \times (0.05\pi)^2 \text{ cm}^2 \times n \text{ h}}{3860 \text{ mAh/g} \times 0.59 \text{ g/cm}^3} \times 10^{12} \mu\text{m}^3/\text{cm}^3 \quad (\text{Equation S2})$$

Each response in the Nyquist plots was fitted using a parallel R–CPE (constant phase element). The impedance of a CPE is calculated as follows<sup>4</sup>.

$$C = R^{(1-n)/n} Q^{1/n} \quad (\text{Equation S3})$$

where Q is a parameter independent of the frequency, n is an exponential factor, and C is the equivalent capacitance of the CPE.

## Supplementary References

- [1] A. Jain, S. P. Ong, G. Hautier, W. Chen, W. D. Richards, S. Dacek, S. Cholia, D. Gunter, D. Skinner, G. Ceder and K. A. Persson, *APL Mater.*, 2013, **1**, 011002.
- [2] K. Yamamoto, S. Yang, M. Takahashi, K. Ohara, T. Uchiyama, T. Watanabe, A. Sakuda, A. Hayashi, M. Tatsumisago, H. Muto, A. Matsuda, and Y. Uchimoto, *ACS Appl. Energy Mater.*, 2021, **4**, 2275–2281.
- [3] A. Kato, M. Yamamoto, A. Sakuda, A. Hayashi, and M. Tatsumisago, *ACS Appl. Energy Mater.* 2018, **1**, 1002–1007.
- [4] F. Yang, L. Li, P. Wu, E. Pradal-Velázquez, H. K. Pearce and D. C. Sinclair, *J. Mater. Chem. C*, 2018, **6**, 9258–9268.
